# Supplementary material
Source: MDPI journal article supplement (https://www.mdpi.com/2073-4344/9/1/66)
Supplement: s1 [file s1]

# Supporting Materials: Dehydrogenation of ethanol to acetaldehyde over different metals supported on carbon catalysts

Jeerati Ob-eye, Piyasan Prasertthdam and Bunjerd Jongsomjit \*

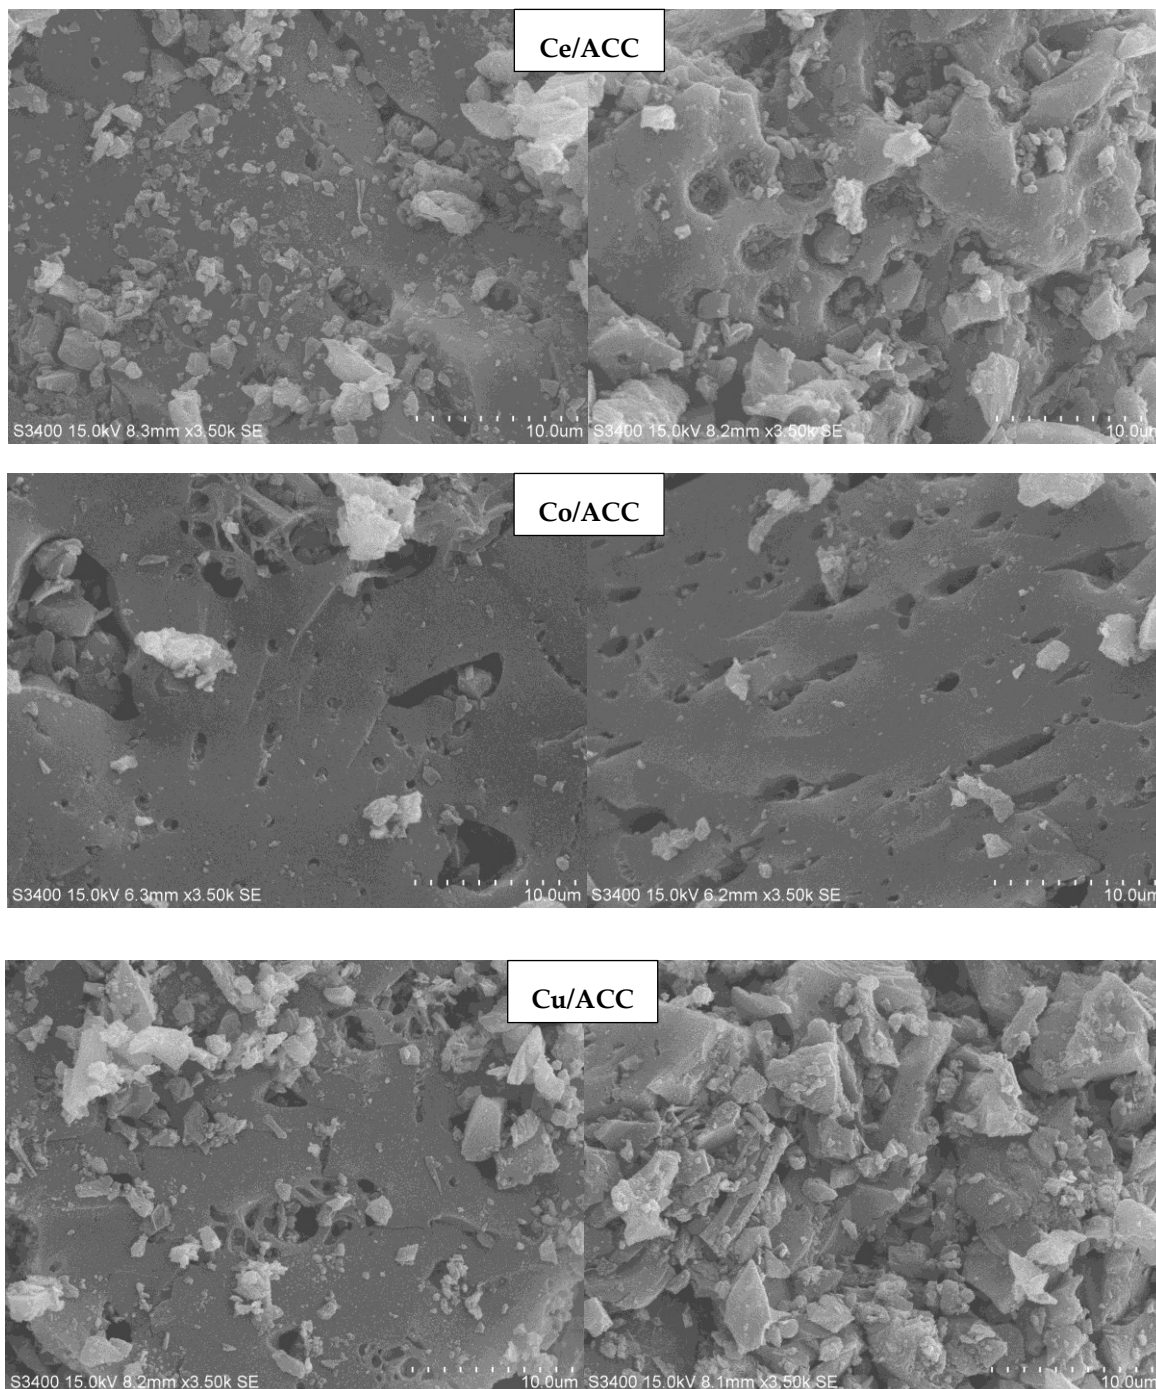

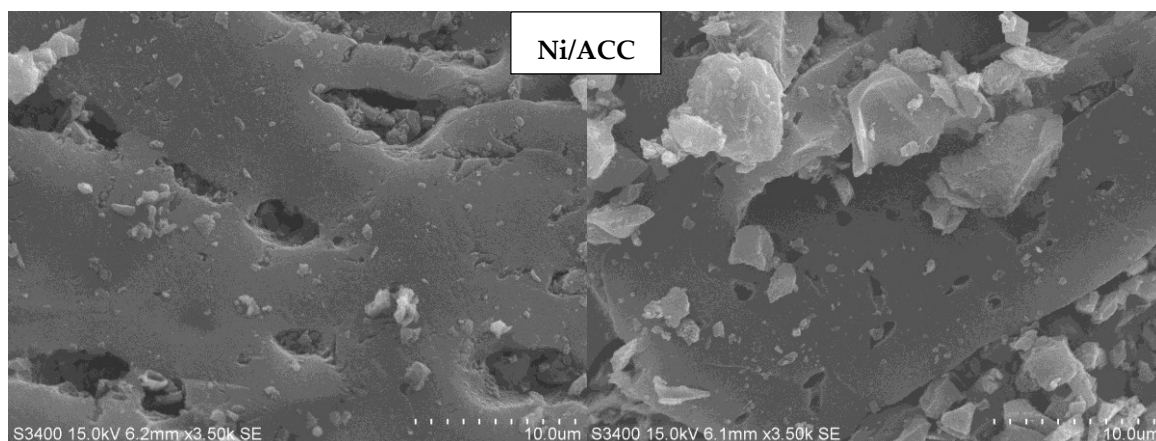

**Figure S1.** SEM images of activated carbon-supported metal catalysts.

**Table S1.** %metal content of the different commercial activated carbon catalysts.

| Activated carbons | % wt metal <sup>*a</sup> | % wt metal <sup>*b</sup> |
|-------------------|--------------------------|--------------------------|
| Ce/ACC            | 28.9                     | 7.37                     |
| Co/ACC            | 26.7                     | 6.73                     |
| Cu/ACC            | 27.4                     | 13.23                    |
| Ni/ACC            | 20.8                     | 7.89                     |

<sup>\*a</sup> by EDX from SEM; <sup>\*b</sup> by EDX from TEM.

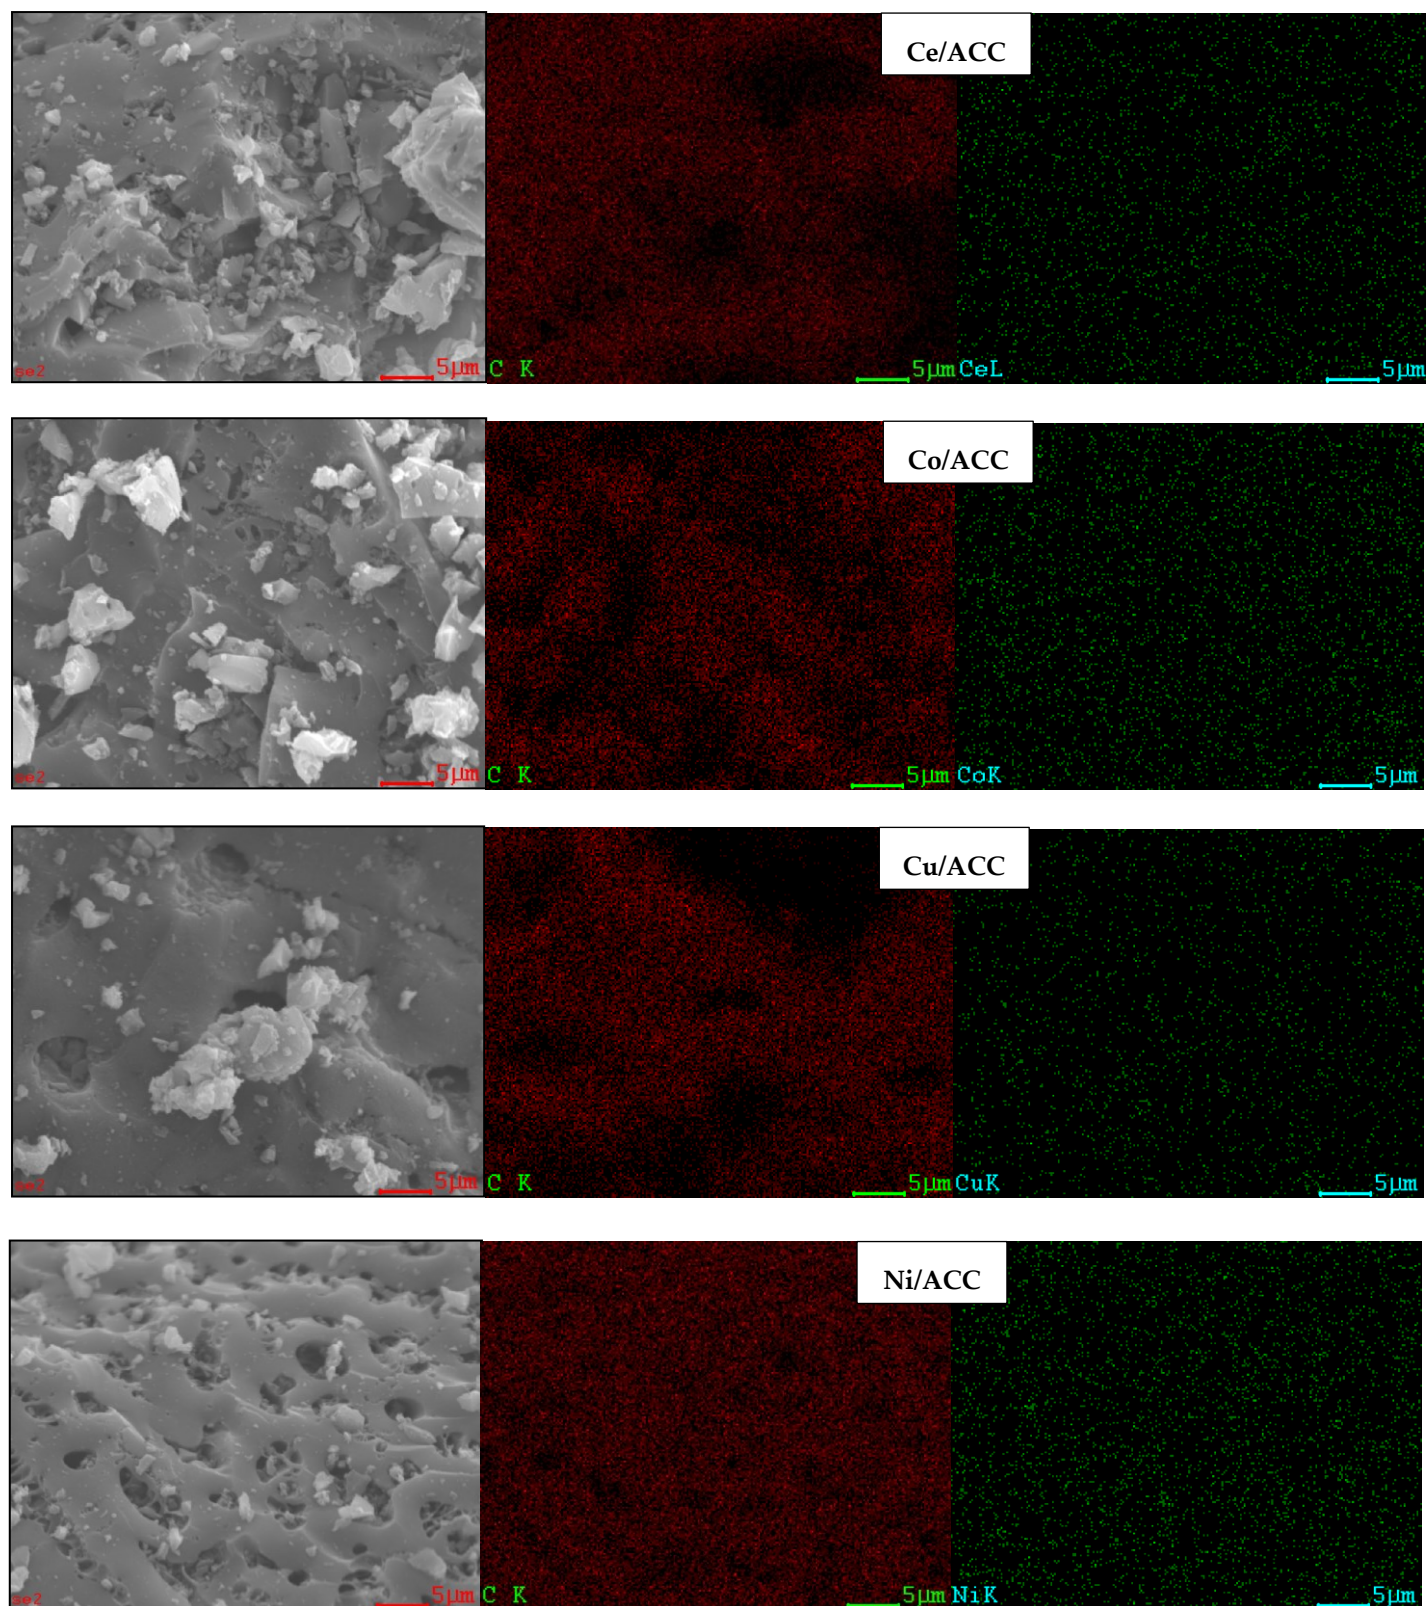

Figure S2. EDX of metal on commercial activated carbons.

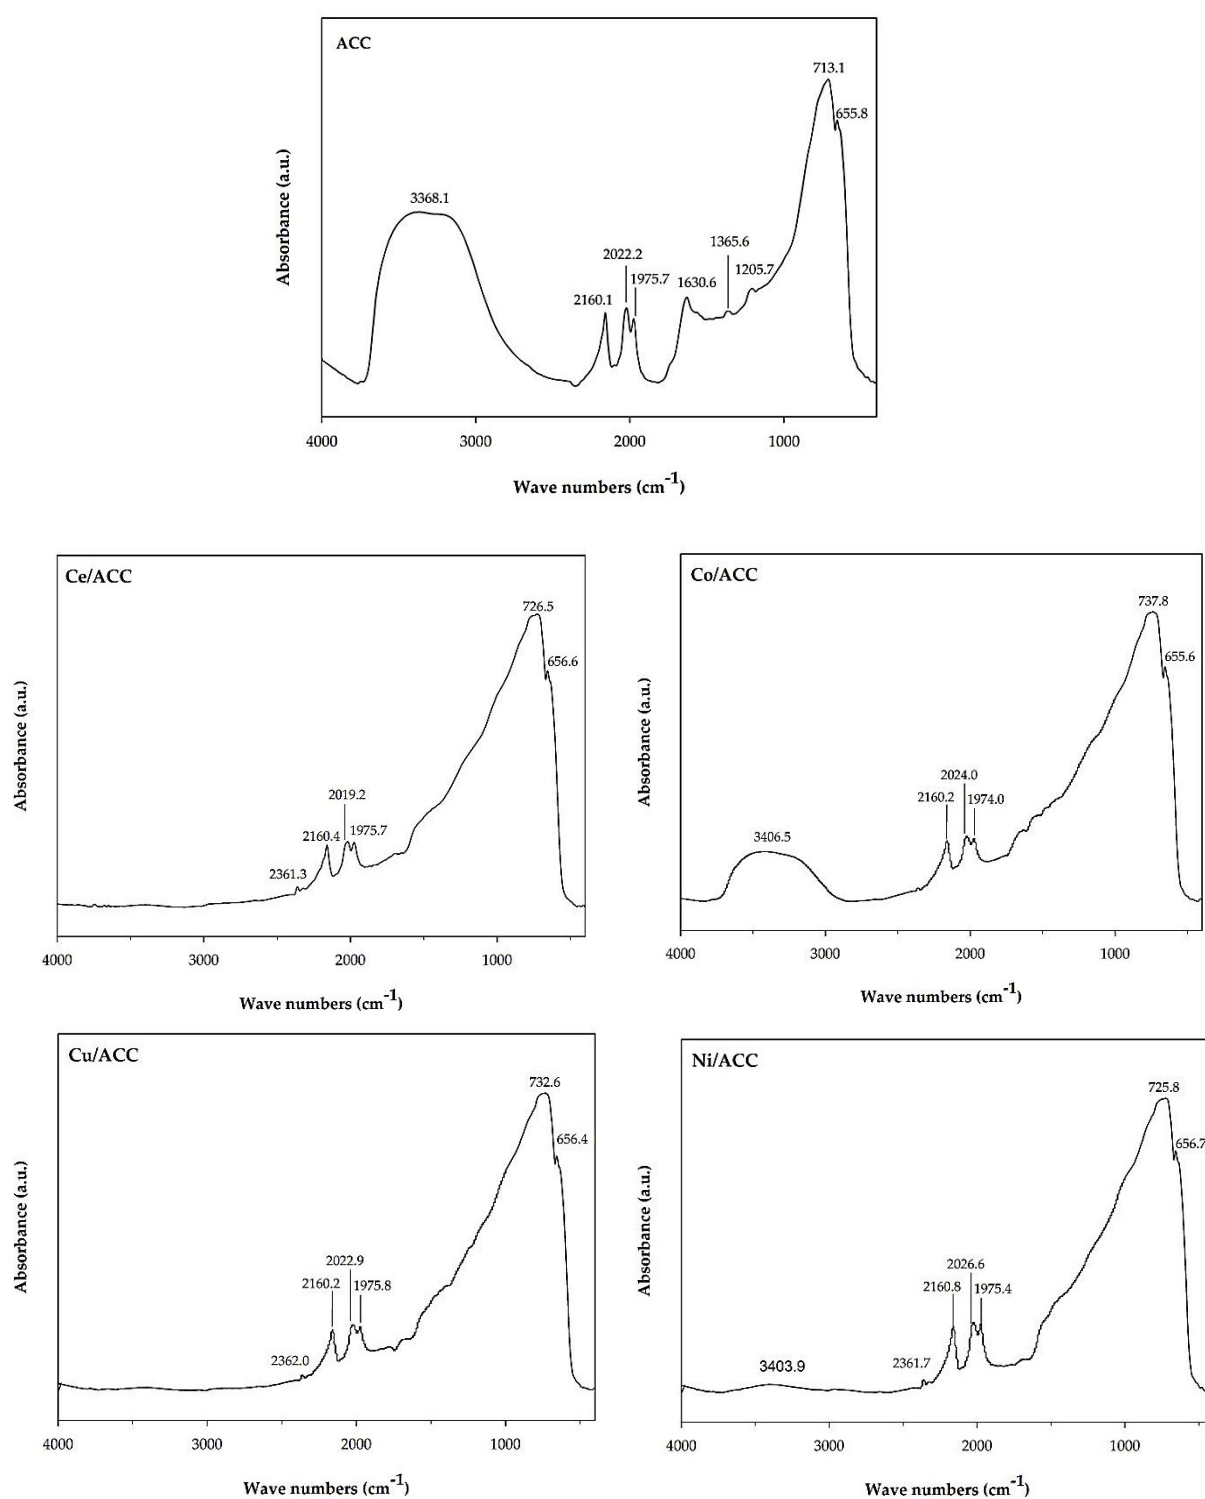

Figure S3. FTIR spectra of catalysts.

**Table S2.** Functional group of activated carbons.

| Catalysts | Assignment                             | Remark                    | Wave number<br>(cm <sup>-1</sup> ) |
|-----------|----------------------------------------|---------------------------|------------------------------------|
| ACC       | $\nu(\text{O-H})$                      | Hydroxyl group as alcohol | 3368                               |
|           | $\text{C}\equiv\text{C}$               | Alkyne groups             | 2160                               |
|           | $\text{C}=\text{C}$ asymmetric stretch | Alkene groups             | 2022                               |
|           | $\text{C}=\text{C}$ asymmetric stretch | Alkene groups             | 1976                               |
|           | $\nu(\text{C}=\text{C})$               | Alkene groups             | 1631                               |
|           | $\text{C-O}$ or $\text{C-OH}$          | Ethers or phenolic groups | 1366                               |
|           | $\text{C-O}$ or $\text{C-OH}$          | Ethers or phenolic groups | 1206                               |
|           | $\text{O-H}$ bend (out-of-plane)       | Alcohols and phenols      | 713                                |
| Ce/ACC    | $\gamma(\text{O-H})$                   | Hydroxyl group            | 656                                |
|           | $\text{C}\equiv\text{C}$               | Alkyne groups             | 2361                               |
|           | $\text{C}\equiv\text{C}$               | Alkyne groups             | 2160                               |
|           | $\text{C}=\text{C}$ asymmetric stretch | Alkene groups             | 2019                               |
|           | $\text{C}=\text{C}$ asymmetric stretch | Alkene groups             | 1976                               |
|           | $\text{O-H}$ bend (out-of-plane)       | Alcohols and phenols      | 727                                |
|           | $\gamma(\text{O-H})$                   | Hydroxyl group            | 657                                |
| Co/ACC    | $\text{O-H}$ stretching                | Hydroxyl groups           | 3407                               |
|           | $\text{C}\equiv\text{C}$               | Alkyne groups             | 2160                               |
|           | $\text{C}=\text{C}$ asymmetric stretch | Alkene groups             | 2024                               |
|           | $\text{C}=\text{C}$ asymmetric stretch | Alkene groups             | 1974                               |
|           | $\text{O-H}$ bend (out-of-plane)       | Alcohols and phenols      | 738                                |
|           | $\gamma(\text{O-H})$                   | Hydroxyl group            | 656                                |
| Cu/ACC    | $\text{C}\equiv\text{C}$               | Alkyne groups             | 2362                               |
|           | $\text{C}\equiv\text{C}$               | Alkyne groups             | 2160                               |
|           | $\text{C}=\text{C}$ asymmetric stretch | Alkene groups             | 2023                               |
|           | $\text{C}=\text{C}$ asymmetric stretch | Alkene groups             | 1976                               |
|           | $\text{O-H}$ bend (out-of-plane)       | Alcohols and phenols      | 733                                |
|           | $\gamma(\text{O-H})$                   | Hydroxyl group            | 656                                |
| Ni/ACC    | $\text{O-H}$ stretching                | Hydroxyl groups           | 3404                               |
|           | $\text{C}\equiv\text{C}$               | Alkyne groups             | 2362                               |
|           | $\text{C}\equiv\text{C}$               | Alkyne groups             | 2161                               |
|           | $\text{C}=\text{C}$ asymmetric stretch | Alkene groups             | 2027                               |
|           | $\text{C}=\text{C}$ asymmetric stretch | Alkene groups             | 1976                               |
|           | $\text{O-H}$ bend (out-of-plane)       | Alcohols and phenols      | 726                                |
|           | $\gamma(\text{O-H})$                   | Hydroxyl group            | 657                                |



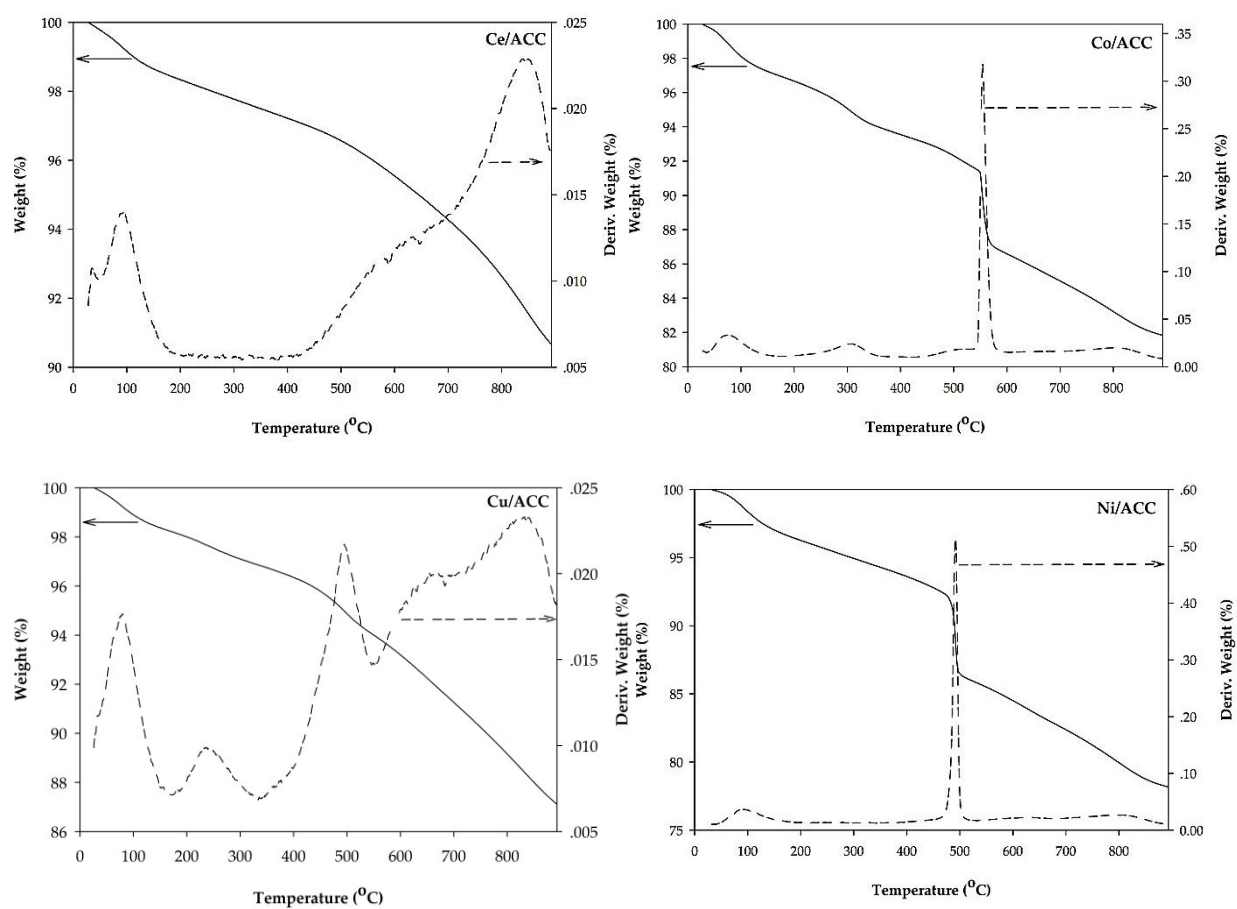

Figure S4. Thermal analysis of activated carbon-supported metal catalysts.

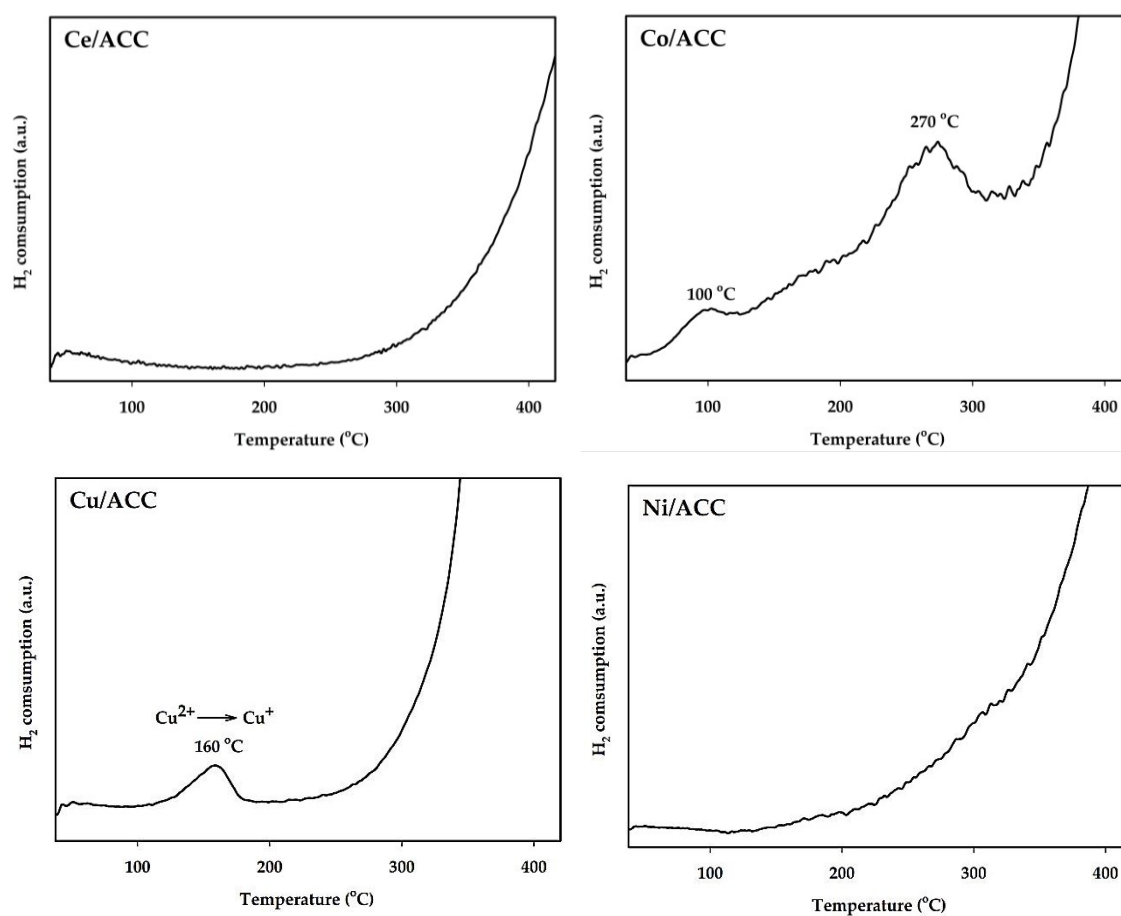

**Figure S5.** TPR profiles of activated carbon-supported metal catalysts.
